# Supplementary material
Source: PubMed Central journal article supplement (PMC2651690)
Supplement: ma801903w_si_001.pdf [file ma801903w_si_001.pdf]

## Supporting Information

### $^1\text{H}$ NMR identification of butyl 3-(oct-1-enylthio)propanoate

$^1\text{H}$  NMR (500MHz,  $\text{CDCl}_3$ ,  $\delta$ ): 0.87 (t, 3H, *n*), 0.92 (t, 3H, *a*), 1.27 (m, 6H, *j*, *k* and *l*), 1.36 (m, 4H, *b* and *m*), 1.61 (m, 2H, *c*), 2.08 (m, 2H, *i*), 2.62 (m, 2H, *e*), 2.89 (m, 2H, *f*), 4.09 (t, 2H, *d*), 5.60 and 5.69 (m, 1H, *h*), 5.87 (m, 1H, *g*). A triplet at 1.92 ppm, arising from the  $-\text{C}\equiv\text{CH}$  in 1-octyne, was not observed in the NMR spectrum; a peak centered at  $2570\text{ cm}^{-1}$ , arising from the SH stretch in butyl 3-mercaptopropanoate, was not observed in the IR spectrum.

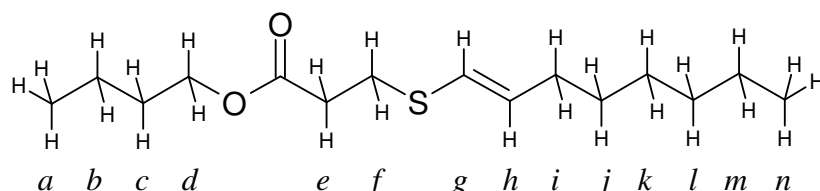

**Figure 1.**  $^1\text{H}$  designation for butyl 3-(oct-1-enylthio)propanoate.

### Verification of butyl 3-(oct-1-enylthio)propanoate via ESI+-MS

Notable peaks,  $\text{MH}^+=273.2$ ,  $\text{MNa}^+=295.2$ ,  $\text{MK}^+=311.1$ , are all consistent with the expected product, butyl 3-(oct-1-enylthio)propanoate  $\text{MW}=272.4$ .

### Molar absorptivity determination for the vinyl thioether functionality

Butyl 3-(oct-1-enylthio)propanoate (BOETP) was synthesized according to the procedure described in the manuscript. BOETP was sandwiched between two NaCl crystals separated by polyester shims with thicknesses ranging from 25 to 127  $\mu\text{m}$ . The infrared spectrum, at a resolution of  $2\text{ cm}^{-1}$ , was collected using a Nicolet Magna-IR 750 Series II FTIR spectrometer. The molar absorptivity was determined by linear regression of the peak area centered at  $1609\text{ cm}^{-1}$  versus pathlength, utilizing the Beer-Lambert law.

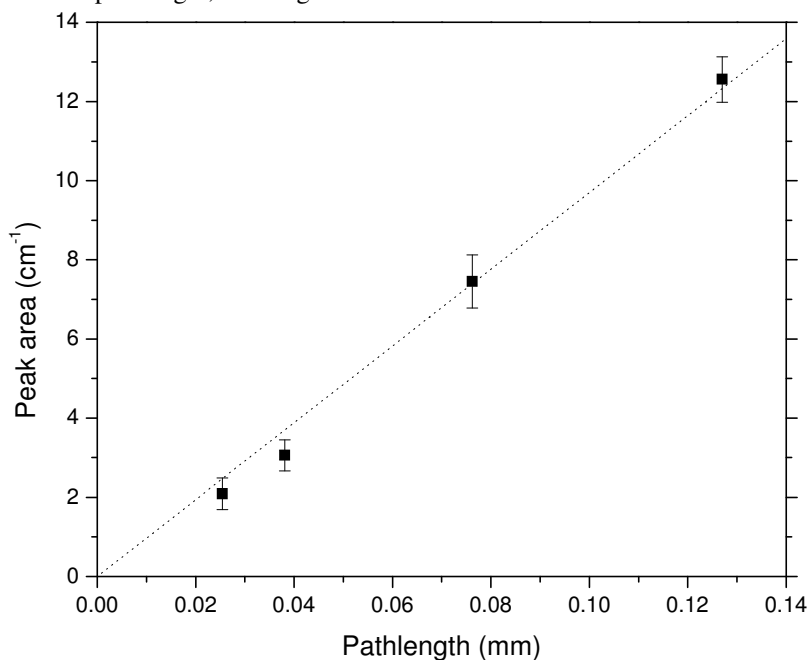

**Figure 2.** Linear regression of peak area centered at  $1609\text{ cm}^{-1}$  versus pathlength (slope =  $970\text{ cm}^{-2}$ ).

The rate constant ratio ( $k_{p,2}/k_{p,1}$ ) was determined as described in the manuscript. Numerically integrating the rate expression ratio (Equation 3), a least squares analysis was performed to find the rate constant ratio that provided the best fit to experimental data up to a 30% conversion. This best fit was found at  $k_{p,2}/k_{p,1}=3.3$ .

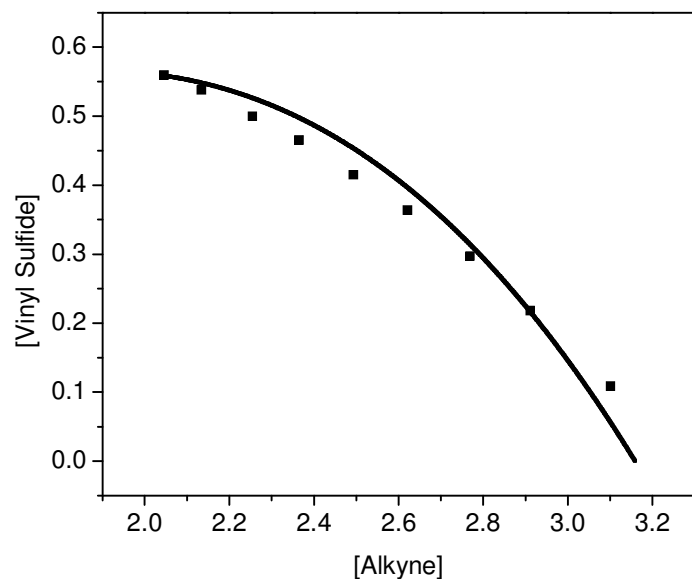

**Figure 3.** Experimental data (■) and numerical integration of reaction rate expression ratio with  $r_{CT,2}/r_{CT,1}$  as the fitting parameter for a least squares regression. Best fit is achieved for  $k_{p,2}/k_{p,1}=3.3$ .
